# Supplementary material for: Extracorporeal Shockwave Therapy for Treating Chronic Low Back Pain: A Systematic Review and Meta‐analysis of Randomized Controlled Trials
Source: Hindawi journal article supplement (doi:10.1155/2021/5937250), 2021-01-01
Supplement: f2 [file 5937250.f2.pdf]

# [Extracorporeal shockwave therapy for treating chronic low-back pain: a systematic review and meta-analysis of randomized controlled trials]

## Data Extraction Form

|          |           |                     |
|----------|-----------|---------------------|
| Trial ID | Extractor | Year of publication |
| Title    |           |                     |
| Authors  |           |                     |

### Does this study meet all the inclusion criteria?

This is a randomized controlled trial. At least the word “random” appears somewhere in the text.

yes  no

The population is [    ]  yes  no

The intervention is [    ]  yes  no

The comparisons are [    ]  yes  no

### Risk of bias assessment

| Domain                                                          | Description | Review authors' judgment                                                                                                                                         |
|-----------------------------------------------------------------|-------------|------------------------------------------------------------------------------------------------------------------------------------------------------------------|
| <b>Random sequence generation</b>                               |             | <i>Selection bias (biased allocation to interventions) due to inadequate generation of a randomised sequence</i><br><b>Low risk/high risk/unclear</b>            |
| <b>Allocation concealment</b>                                   |             | <i>Selection bias (biased allocation to interventions) due to inadequate concealment of allocations prior to assignment</i><br><b>Low risk/high risk/unclear</b> |
| <b>Blinding of participants</b><br><i>Outcome:</i>              |             | <i>Performance bias due to knowledge of the allocated interventions by participants during the study</i><br><b>Low risk/high risk/unclear</b>                    |
| <b>Blinding of personnel /care providers</b><br><i>Outcome:</i> |             | <i>Performance bias due to knowledge of the allocated interventions by personnel/care providers during the study.</i><br><b>Low risk/high risk/unclear</b>       |
| <b>Blinding of outcomes assessors</b><br><i>Outcome:</i>        |             | <i>Detection bias due to knowledge of the allocated interventions by outcome assessors</i><br><b>Low risk/high risk/unclear</b>                                  |

|                                                   |  |                                                                                                                                                                               |
|---------------------------------------------------|--|-------------------------------------------------------------------------------------------------------------------------------------------------------------------------------|
| <b>Incomplete outcome data</b><br><i>Outcome:</i> |  | <i>Attrition bias</i> due to amount, nature or handling of incomplete outcome data<br><b>Low risk/high risk/unclear</b>                                                       |
| <b>Selective outcome reporting</b>                |  | <i>Reporting bias</i> due to selective outcome reporting<br><b>Low risk/high risk/unclear</b>                                                                                 |
| <b>Group similarity at baseline</b>               |  | <i>Selection bias</i> due to dissimilarity at baseline for the most important prognostic indicators<br><b>Low risk/high risk/unclear</b>                                      |
| <b>Co-interventions</b>                           |  | <i>Performance bias</i> because co-interventions were different across groups.<br>Low risk/high risk/unclear                                                                  |
| <b>Compliance</b>                                 |  | <i>Performance bias</i> due to inappropriate compliance with interventions across groups.<br><b>Low risk/high risk/unclear</b>                                                |
| <b>Intention-to-treat-analysis</b>                |  | <i>Risk of bias</i> if all randomized patients are not reported and analyzed in the group to which they were allocated by randomization.<br><b>Low risk/high risk/unclear</b> |
| <b>Timing of outcome assessments</b>              |  | <i>Detection bias</i> if important outcomes were not measured at the same time across groups.<br><b>Low risk/high risk/unclear</b>                                            |
| <b>Other bias</b>                                 |  | <i>Bias due to problems not covered elsewhere in the table.</i><br><b>Low risk/high risk/unclear</b>                                                                          |

## Methods

*(Study design including, where relevant, a clear indication of how the study differs from a standard parallel group design; duration of the study)*

## Participants

*(Setting; relevant details of health status of participants; age; sex; country)*

**Inclusion criteria:**

**Exclusion criteria:**

### **Intervention**

*(A clear list of the intervention groups included in the study)*

**Experiment group:**

**Control group:**

### **Additional information requested**

### **Notes**

## Outcomes

| Outcome Measures (Continuous) |                                      | Total participants<br>N = |      |    |                      |      |    |
|-------------------------------|--------------------------------------|---------------------------|------|----|----------------------|------|----|
|                               |                                      | Intervention group<br>n = |      |    | Control group<br>n = |      |    |
|                               |                                      | total                     | mean | SD | total                | mean | SD |
|                               | <b>Primary (pain intensity):</b>     |                           |      |    |                      |      |    |
| 1                             | VAS                                  |                           |      |    |                      |      |    |
| 2                             | NRS                                  |                           |      |    |                      |      |    |
| 3                             | Others                               |                           |      |    |                      |      |    |
|                               | <b>Secondary (disability score):</b> |                           |      |    |                      |      |    |
| 4                             | ODI                                  |                           |      |    |                      |      |    |
| 5                             | EQ-5D                                |                           |      |    |                      |      |    |
| 6                             | Others                               |                           |      |    |                      |      |    |

| Outcome Measures (Dichotomous) |                                  | Total participants<br>N = |       |                      |       |
|--------------------------------|----------------------------------|---------------------------|-------|----------------------|-------|
|                                |                                  | Intervention group<br>n = |       | Control group<br>n = |       |
|                                |                                  | events                    | total | events               | total |
|                                | <b>Primary (adverse events):</b> |                           |       |                      |       |
| 1                              |                                  |                           |       |                      |       |
